# Supplementary material
Source: Springer Nature journal article supplement (https://www.springermedizin.de/resource/supplementary/12933_2013_757_MOESM4_ESM.pdf/9538914)

**A**

ZL

ZDF

ZDF+epl.

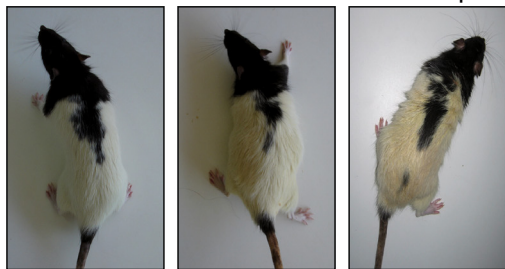

Plasma:

|                     |             |                             |                           |
|---------------------|-------------|-----------------------------|---------------------------|
| Aldosterone (pg/ml) | 180±57.19   | 430±192.63*                 | 816±154.49 <sup>††</sup>  |
| Glucose (mg/dl)     | 194.55±38.2 | 666.66±102.61 <sup>**</sup> | 697.51±89.8               |
| Insulin (ng/mL)     | 1.08±0.11   | 1.83±0.24*                  | 2.00±0.28                 |
| Ch (mg/dl)          | 61.11±8.35  | 187.16±14.13 <sup>**</sup>  | 143.4±12.26 <sup>††</sup> |
| TAG (mg/dl)         | 39.66±8.36  | 397.66±166.87 <sup>**</sup> | 111.7±33.21 <sup>††</sup> |
| FFA (mM)            | 1.61±1.15   | 5.17±1.19 <sup>**</sup>     | 0.73±0.3 <sup>††</sup>    |
| HDL (mg/dl)         | 19.77±2.33  | 76.5±10.36 <sup>**</sup>    | 73.2±12.26                |
| Ch non-HDL (mg/dl)  | 41.33±6.53  | 112.33±14.05 <sup>**</sup>  | 111.75±32.8               |

Weight (g)

431.9±26.73

341.14±38.71<sup>\*\*</sup>

338.25±70.26

HW/FL

0.41±0.03

0.55±0.06\*

0.47±0.01<sup>†</sup>**B**

ZL

ZDF

ZDF+epl.

Echo-Doppler

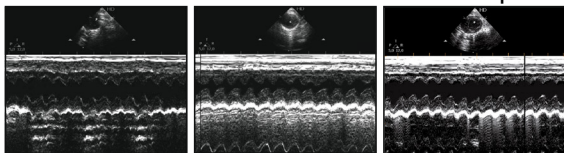

|            |             |                          |                          |
|------------|-------------|--------------------------|--------------------------|
| LVPW (cm)  | 0.21±0.036  | 0.23±0.034               | 0.22±0.03                |
| IVS (cm)   | 0.18±0.029  | 0.24±0.015 <sup>**</sup> | 0.2±0.032 <sup>†</sup>   |
| LVDD (cm)  | 0.71±0.10   | 0.51±0.115*              | 0.5±0.078                |
| LVSD (cm)  | 0.32±0.097  | 0.21±0.076*              | 0.22±0.061               |
| EF (Teich) | 0.88±0.07   | 0.9±0.07                 | 0.85±0.09                |
| Dec. T (s) | 0.036±0.001 | 0.04±0.003*              | 0.031±0.005 <sup>†</sup> |
| E/A ratio  | 1.22±0.03   | 1.05±0.03*               | 1.18±0.02 <sup>†</sup>   |

**C**

ANP/18s mRNA expression (n-fold)

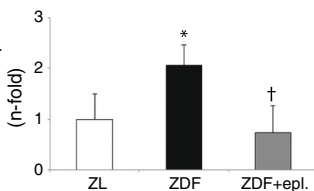

Supplement: MOESM4 [file 9538914]
